# Supplementary material for: Perfluoroalkyl acids in dust on residential indoor/outdoor window glass in Chinese cities: occurrence, composition and toddler exposure
Source: Research Square preprint supplement (doi:10.21203/rs.3.rs-209928/v1), 2021-05-27
Supplement: Supplementary file 1 [file 390ad82f6dcd5428cc036a02.docx]

# Supporting information

Perfluoroalkyl acids in dust on residential indoor/outdoor window glass in Chinese cities: occurrence, composition and toddler exposure

Zhen Zhaoa, Linxia Yueb, Hongqin Qiaoc, Yinong Lid, Xianghui Chengc, Xia Huad, Tian Lina, Qilu Lic, Hongwen Sund

a College of Marine Ecology and Environment, Shanghai Ocean University, Shanghai 201306, China;

b Key Laboratory for Heavy Metal Pollution Control and Reutilization, School of Environment and Energy, Peking University Shenzhen Graduate School, Shenzhen, 518055, China

c Key Laboratory for Yellow River and Huai River Water Environment and Pollution Control, Ministry of Education, Henan Key Laboratory for Environmental Pollution Control, School of Environment, Henan Normal University, Xinxiang 453007, China;

d MOE Key Laboratory of Pollution Processes and Environmental Criteria, College of Environmental Science and Engineering, Nankai University, Tianjin 300071, China

Corresponding author: Dr. Qilu Li, Email: lqlblue@hotmail.com

Pages 13

Tables 6

Table S1 Full name, acronym and characteristic ions of target PFAA standards.

| **Compound name** | **Acronym** | **Precurson/product ion (for HPLC-MS/MS)** |
| --- | --- | --- |
| **Perfluoroalkyl carboxylic acids (PFCAs)** |  |  |
| Perfluorobutanoic acid | PFBA | 213.0/168.7 |
| Perfluoropentanoic acid | PFPeA | 262.8/218.9 |
| Perfluorohexanoic acid | PFHxA | 313.0/268.9 |
| Perfluoroheptanoic acid | PFHpA | 362.9/318.9 |
| Perfluorooctanoic acid | PFOA | 412.9/368.9 |
| Perfluorononanoic acid | PFNA | 462.9/418.8 |
| Perfluorodecanoic acid | PFDA | 512.9/468.9 |
| Perfluoroundecanoic acid | PFUnDA | 562.8/518.8 |
| Perfluorododecanoic acid | PFDoDA | 613.0/568.8 |
| **Perfluoroalkane sulfonic acids (PFSAs)** |  |  |
| Perfluorobutane sulfonate acid | PFBS | 298.9/79.9 |
| Perfluorohexane sulfonate acid | PFHxS | 398.9/79.9 |
| Perfluorooctane sulfonate acid | PFOS | 498.8/79.7 |
| Perfluorodecane sulfonate acid | PFDS | 598.8/98.7 |
| **Fluorotelomer sulfonic acids (FTSAs)** |  |  |
| 4:2 Fluorotelomer sulfonic acid | 4:2 FTSA | 326.8/306.7 |
| 6:2 Fluorotelomer sulfonic acid | 6:2 FTSA | 427.2/406.9 |
| 8:2 Fluorotelomer sulfonic acid | 8:2 FTSA | 526.8/506.8 |
| 10:2 Fluorotelomer sulfonic acid | 10:2 FTSA | 626.7/606.7 |
| **Fluorotelomer carboxylic acids (FTCAs)** |  |  |
| 3:3 Fluorotelomer carboxylic acid | 3:3 FTCA | 241.1/177.0 |
| 5:3 Fluorotelomer carboxylic acid | 5:3 FTCA | 340.9/216.8 |
| 7:3 Fluorotelomer carboxylic acid | 7:3 FTCA | 440.9/337.2 |
| 6:2 Fluorotelomer carboxylic acid | 6:2 FTCA | 376.9/293.0 |
| 8:2 Fluorotelomer carboxylic acid | 8:2 FTCA | 477.0/393.0 |
| **Fluorotelomer unsaturated acids (FTUCAs)** |  |  |
| 6:2 Fluorotelomer unsaturated acid | 6:2 FTUCA | 356.9/292.9 |
| 8:2 Fluorotelomer unsaturated acid | 8:2 FTUCA | 456.9/392.9 |
| **Chlorinated polyfluoroalkyl ether sulfonic acids (Cl-PFESAs)** | |  |
| 9-Chloroeicosafluoro-3-oxaundecane-1-sulfonate acid | Cl-6:2 PFESA | 530.9/82.9 |
| 11-Chloroeicosafluoro-3-oxaundecane-1-sulfonate acid | Cl-8:2 PFESA | 630.8/450.9 |
| **Perfluoropolyethers (PFPEs)** |  |  |
| Ammonium 4,8-dioxa-3H-perfluorononanoate acid | ADONA | 376.9/250.9 |
| Hexafluoropropylene oxide dimer acid | HFPO-DA | 328.9/285.0 |
| Perfluoro-4-ethylcyclohexanesulfonate | PFECHS | 460.8/98.8 |
|  |  |  |
| Perfluoro-[1,2,3,4-13C4]-butanoic acid | 13C4-PFBA | 216.8/171.8 |
| Perfluoro-[1,2,3-13C3]-valeric acid | 13C3-PFPeA | 265.9/222 |
| Perfluoro-[1,2-13C2]-hexanoic acid | 13C2-PFHxA | 314.9/270 |
| Perfluoro-[1,2,3,4-13C4]-heptanoic acid | 13C4-PFHpA | 366.9/321.9 |
| Perfluoro-[1,2,3,4-13C4]-octanoic acid | 13C4-PFOA | 417.0/371.8 |
| Perfluoro-[1,2,3,4,5-13C2]-nonanoic acid | 13C2-PFNA | 467.2/422.9 |
| Perfluoro-[1,2-13C2]-decanoic acid | 13C2-PFDA | 514.8/469.8 |
| Perfluoro-[1,2-13C2]-undecanoic acid | 13C2-PFUnDA | 565.0/519.9 |
| Perfluoro-[1,2-13C2]-dodecanoic acid | 13C2-PFDoA | 614.8/569.8 |
| Sodium perfluorohexane-[18O2]-sulfonate | 18O2-PFHxS | 403.0/83.9 |
| Sodium perfluoro-[1,2,3,4-13C4]-octane sulfonate | 13C4-PFOS | 502.9/79.5 |
| Sodium 1H,1H,2H,2H-perfluoro-1-[1,2-13C2]-octane sulfonate (6:2) | 13C2-6:2 FTSA | 428.9/408.8 |
| Sodium 1H,1H,2H,2H-perfluoro-1-[1,2-13C2]-decane sulfonate (8:2) | 13C2-8:2 FTSA | 528.8/508.8 |

Table S2 The information of samples collected on Feb. 14 (SC I) and 21 (SC II), 2018

| City | Coordination | Altitude (m) | Date | Inside/Outside | Sample lable | Surface area/m2 | Cotton ball number | Last cleaning | Fireworks for celebrating |
| --- | --- | --- | --- | --- | --- | --- | --- | --- | --- |
| Harbin, Heilongjiang | 45°41ˊ10″N 126°45ˊ31″E | 470 | 2018.02.14 | Inside | I-HRB-0214 | 4.0 | 6 | 15 months ago | Yes |
| Outside | O-HRB-0214 | 4.0 | 6 |
| 2018.02.21 | Inside | I-HRB-0221 | 4.0 | 6 |
| Outside | O-HRB-0221 | 4.0 | 6 |
| Ordos, Inner Mongolia Municipality | 39°47′26″N 109°58′32″E | 1440 | 2018.02.14 | Inside | I-OD-0214 | 6.7 | 4 | 1 week ago | Yes |
| Outside | O-OD-0214 | 6.7 | 4 |
| 2018.02.21 | Inside | I-OD-0221 | 6.7 | 4 |
| Outside | O-OD-0221 | 6.7 | 4 |
| Tianjin | 39°04′14″N 117°08′14″E | -18 | 2018.02.14 | Inside | I-TJ-0214 | 4.6 | 16 | 1-2 weeks ago | Yes |
| Outside | O-TJ-0214 | 4.6 | 16 |
| 2018.02.21 | Inside | I-TJ-0221 | 4.6 | 16 |
| Outside | O-TJ-0221 | 4.6 | 16 |
| XinZhou, Shanxi | 38°42ˊ59"N 112°42ˊ58"E | 1058 | 2018.02.14 | Inside | I-XZ-0214 | 4.6 | 15 | 1 year | Yes |
| Outside | O-XZ-0214 | 4.6 | 15 |
| 2018.02.21 | Inside | I-XZ-0221 | 4.6 | 15 |
| Outside | O-XZ-0221 | 4.6 | 15 |
| Handan,  Hebei | 36°20ˊ43"N 114°54ˊ54"E | 5 | 2018.02.14 | Inside | I-HD-0214 | 3.1 | 8 | 1 month ago | Yes |
| Outside | O-HD-0214 | 3.1 | 8 |
| 2018.02.21 | Inside | I-HD-0221 | 3.1 | 8 |
| Outside | O-HD-0221 | 3.1 | 8 |
| Sanmenxia, Henan | 34°46ˊ46"N 111°10ˊ53"E | 41 | 2018.02.14 | Inside | I-SMX-0214 | 3.6 | 10 | 2-3 days ago | No |
| Outside | O-SMX-0214 | 3.6 | 10 |
| 2018.02.21 | Inside | I-SMX-0221 | 3.6 | 10 |
| Outside | O-SMX-0221 | 3.6 | 10 |
| Nanyang, Henan | 32°57ˊ8"N 113°1ˊ49"E | 120 | 2018.02.14 | Inside | I-NY-0214 | 4.0 | 5 | 1 week ago | Yes |
| Outside | O-NY-0214 | 4.0 | 5 |
| 2018.02.21 | Inside | I-NY-0221 | 4.0 | 5 |
| Outside | O-NY-0221 | 4.0 | 5 |
| Jiujiang, Jiangxi | 29.38ˊ2"N 115°57ˊ50"E | 82 | 2018.02.14 | Inside | I-JJ-0214 | 3.6 | 7 | 2 weeks ago | Yes |
| Outside | O-JJ-0214 | 3.6 | 7 |
| 2018.02.21 | Inside | I-JJ-0221 | 3.6 | 7 |
| Outside | O-JJ-0221 | 3.6 | 7 |
| Hongkong | 22°19ˊ40"N 114°10ˊ34"E | 352 | 2018.02.14 | Inside | I-HK-0214 | 0.6 | 1 | 17 month ago | No |
| Outside | O-HK-0214 | 0.6 | 1 |
| 2018.02.21 | Inside | I-HK-0221 | 0.6 | 1 |
| Outside | O-HK-0221 | 0.6 | 1 |
| Shijiazhuang, Hebei | 38°10ˊ44"N 114°58ˊ34"E | 46 | 2018.02.14 | Inside | I-SJZ-0214 | 4.2 | 4 | 10 days ago | Yes |
| 2018.02.21 | Inside | I-SJZ-0221 | 4.2 | 4 |
| Sanya, Hainan | 18°16ˊ5"N 109°29ˊ12"E | 10 | 2018.2.14 | Inside | I-SY-0214 | 3.6 | 3 | 3 month ago | Yes |
| 2018.02.21 | Inside | I-SY-0221 | 3.6 | 3 |

Table S3 Instrument quantification limit (IQL) and method quantification limit (MQL) of individual compound

| Compound name | IQL/ng | MQL/ng/m2 |
| --- | --- | --- |
| PFBA | 3.60 | 3.00 |
| PFPeA | 0.05 | 0.04 |
| PFHxA | 4.92 | 4.10 |
| PFHpA | 11.52 | 9.60 |
| PFOA | 0.02 | 0.02 |
| PFNA | 0.10 | 0.08 |
| PFDA | 0.02 | 0.02 |
| PFUnDA | 0.01 | 0.01 |
| PFDoDA | 0.01 | 0.01 |
| PFBS | 0.01 | 0.01 |
| PFHxS | 0.10 | 0.08 |
| PFOS | 0.24 | 0.20 |
| PFDS | 0.01 | 0.01 |
| 4:2 FTSA | 0.05 | 0.04 |
| 6:2 FTSA | 0.11 | 0.09 |
| 8:2 FTSA | 0.01 | 0.01 |
| 10:2 FTSA | 0.01 | 0.01 |
| 3:3 FTCA | 0.06 | 0.05 |
| 5:3 FTCA | 0.02 | 0.02 |
| 7:3 FTCA | 0.02 | 0.02 |
| 6:2 FTCA | 0.04 | 0.03 |
| 8:2 FTCA | 0.04 | 0.03 |
| 6:2 FTUCA | 0.01 | 0.01 |
| 8:2 FTUCA | 0.02 | 0.02 |
| Cl-6:2 PFESA | 0.01 | 0.01 |
| Cl-8:2 PFESA | 0.01 | 0.01 |
| ADONA | 0.01 | 0.01 |
| HFPO-DA | 2.16 | 1.80 |
| PFECHS | 0.24 | 0.20 |

Table S4-1 Detection frequency (%) and concentration (ng/m2) of individual PFAA in the dust on the window glasses

| City | Sample label | PFBA | PFPeA | PFHxA | PFOA | PFNA | PFDA | PFUnDA | PFDoDA | PFBS | PFOS | PFHxS | 6:2 FTSA |
| --- | --- | --- | --- | --- | --- | --- | --- | --- | --- | --- | --- | --- | --- |
|  | Detection frequency | 78% | 48% | 18% | 38% | 70% | 80% | 53% | 23% | 58% | 10% | 28% | 58% |
| Harbin, Heilongjiang | I-HRB-0214 | 1.86 | nd | nd | 0.28 | 0.16 | 0.14 | 0.02 | 0.05 | 0.01 | nd | nd | 0.16 |
| I-HRB-0221 | 1.04 | nd | nd | 0.35 | 0.16 | 0.17 | 0.04 | 0.06 | 0.02 | nd | nd | 0.19 |
| O-HRB-0214 | 0.94 | 0.19 | nd | 0.39 | nd | 0.15 | nd | 0.06 | nd | nd | nd | nd |
| O-HRB-0221 | 2.25 | 0.26 | nd | 0.30 | 0.13 | 0.14 | 0.01 | 0.03 | nd | nd | nd | nd |
| Ordos, Inner Mongolia Municipality | I-ORDS-0214 | 1.20 | nd | nd | nd | 0.10 | nd | nd | nd | 0.02 | nd | nd | nd |
| I-ORD-0221 | 0.85 | nd | nd | nd | nd | nd | nd | nd | nd | nd | nd | nd |
| O-ORDS-0214 | nd | nd | nd | nd | nd | nd | nd | nd | nd | nd | nd | 15.68 |
| O-ORDS-0221 | nd | 0.04 | nd | nd | nd | nd | nd | nd | 0.03 | nd | nd | nd |
| Tianjin | I-TJ-0214 | 3.75 | nd | 1.19 | nd | 0.75 | 0.11 | nd | nd | 0.11 | nd | 0.08 | 0.13 |
| I-TJ-0221 | 0.69 | 0.11 | nd | 0.85 | 4.81 | 0.13 | 0.03 | 0.03 | 0.04 | 0.23 | 0.14 | nd |
| O-TJ-0214 | 2.26 | 0.06 | nd | nd | 0.08 | 0.05 | nd | nd | 0.05 | nd | nd | 0.10 |
| O-TJ-0221 | 5.77 | nd | 1.14 | 1.18 | 1.96 | 0.05 | 0.02 | 0.03 | 0.07 | 0.30 | 0.11 | 0.10 |
| XinZhou, Shanxi | I-XZ-0214 | 3.36 | 1.68 | nd | nd | 0.25 | 0.02 | 0.02 | nd | 0.04 | nd | nd | 0.28 |
| I-XZ-0221 | 3.44 | nd | nd | nd | 0.24 | 0.02 | nd | nd | nd | nd | nd | 0.33 |
| O-XZ-0214 | 24.01 | 0.55 | 1.31 | 0.40 | 2.92 | 0.32 | 0.03 | nd | 0.16 | 0.30 | 0.28 | 2.95 |
| O-XZ-0221 | 2.61 | 0.06 | nd | nd | 0.32 | nd | nd | nd | 0.04 | nd | nd | 0.24 |
| Handan,  Hebei | I-HD-0214 | 5.63 | 0.24 | 2.48 | 1.63 | 0.80 | 0.13 | 0.04 | 0.08 | 0.06 | nd | 0.10 | 0.47 |
| I-HD-0221 | 2.29 | nd | nd | nd | 0.15 | 0.05 | 0.02 | nd | nd | nd | nd | 0.19 |
| O-HD-0214 | 1.23 | nd | nd | nd | nd | 0.02 | nd | nd | nd | nd | nd | 0.23 |
| O-HD-0221 | 0.96 | 0.14 | 0.94 | 1.35 | 0.13 | 0.13 | 0.01 | 0.01 | 0.09 | nd | 0.09 | nd |
| Sanmenxia, Henan | I-SMX-0214 | 24.64 | 0.30 | 1.09 | 0.40 | 1.85 | 0.27 | 0.01 | nd | 0.13 | 0.51 | 0.13 | 1.43 |
| I-SMX-0221 | 3.41 | 0.13 | nd | 0.32 | 1.10 | 0.23 | 0.02 | nd | 0.04 | nd | 0.09 | 0.40 |
| O-SMX-0214 | 21.92 | 0.19 | 1.12 | 0.68 | 1.92 | 0.26 | 0.04 | 0.04 | 0.19 | nd | 0.26 | 1.11 |
| O-SMX-0221 | 3.70 | 0.21 | nd | nd | 0.38 | 0.13 | 0.02 | nd | 0.02 | nd | nd | 0.87 |
| Nanyang, Henan | I-NY-0214 | nd | 0.09 | nd | nd | nd | 0.02 | nd | nd | nd | nd | nd | 0.65 |
| I-NY-0221 | nd | nd | nd | nd | nd | nd | nd | nd | 0.02 | nd | nd | 0.27 |
| O-NY-0214 | nd | nd | nd | nd | nd | nd | nd | nd | nd | nd | nd | nd |
| O-NY-0221 | nd | nd | nd | nd | 0.11 | 0.02 | nd | nd | nd | nd | nd | nd |
| Jiujiang, Jiangxi | I-JJ-0214 | 1.76 | nd | nd | 0.03 | nd | 1.56 | 0.06 | nd | nd | nd | nd | nd |
| I-JJ-0221 | nd | 0.10 | nd | nd | nd | 0.53 | nd | nd | nd | nd | nd | nd |
| O-JJ-0214 | 6.02 | 0.21 | nd | 0.02 | 0.80 | 0.69 | nd | nd | nd | nd | nd | nd |
| O-JJ-0221 | nd | nd | nd | nd | nd | 0.29 | nd | nd | nd | nd | nd | nd |
| Hongkong | I-HK-0214 | 11.47 | nd | nd | nd | 1.48 | 0.15 | 0.11 | nd | 1.18 | nd | nd | 1.06 |
| I-HK-0221 | 8.39 | nd | nd | nd | 1.45 | 0.49 | 0.10 | nd | 0.10 | nd | nd | 0.88 |
| O-HK-0214 | 13.71 | nd | nd | 1.74 | 5.96 | 1.56 | 0.08 | nd | 0.65 | nd | 0.72 | 2.57 |
| O-HK-0221 | 5.52 | nd | nd | nd | 1.14 | 0.17 | 0.12 | nd | 0.08 | nd | nd | nd |
| Shijiazhuang, Hebei | I-SJZ-0214 | 0.57 | nd | nd | nd | 0.12 | 0.02 | nd | nd | nd | nd | 0.29 | nd |
| I-SJZ-0221 | nd | nd | nd | nd | nd | nd | nd | nd | nd | nd | nd | nd |
| Sanya, Hainan | I-SY-0214 | 2.49 | 0.11 | nd | nd | 0.10 | 0.05 | 0.09 | nd | nd | nd | nd | nd |
| I-SY-0221 | 4.88 | 0.11 | nd | nd | 0.42 | 0.09 | 0.04 | nd | 0.01 | nd | nd | 0.29 |

nd: not detected

Table S4-2 Detection frequency (%) and concentration (ng/m2) of individual PFAA and ∑PFAA in the dust on the window glasses

| City | Sample label | 8:2 FTSA | 10:2 FTSA | HFPO-DA | PFECHS | ADONA | 3:3 FTCA | 5:3 FTCA | 6:2 FTCA | 6:2 FTUCA | 8:2 FTUCA | ∑PFAA* |
| --- | --- | --- | --- | --- | --- | --- | --- | --- | --- | --- | --- | --- |
|  | Detection frequency | 15% | 15% | 53% | 18% | 8% | 40% | 13% | 20% | 33% | 20% |  |
| Harbin, Heilongjiang | I-HRB-0214 | nd | nd | 0.50 | nd | nd | nd | nd | nd | 0.01 | 0.02 | 3.21 |
| I-HRB-0221 | nd | nd | nd | nd | nd | nd | nd | nd | 0.01 | 0.03 | 2.08 |
| O-HRB-0214 | nd | nd | 1.87 | nd | nd | nd | 0.04 | nd | 0.03 | nd | 3.67 |
| O-HRB-0221 | nd | nd | 1.11 | nd | nd | nd | nd | nd | 0.01 | 0.03 | 4.28 |
| Ordos, Inner Mongolia Municipality | I-ORDS-0214 | nd | nd | nd | nd | nd | nd | nd | nd | nd | nd | 1.32 |
| I-ORD-0221 | nd | nd | 0.42 | nd | nd | nd | nd | nd | nd | nd | 1.28 |
| O-ORDS-0214 | 0.65 | 2.10 | nd | 9.15 | nd | nd | nd | nd | nd | nd | 27.58 |
| O-ORDS-0221 | nd | nd | 0.26 | nd | nd | 0.14 | nd | nd | nd | nd | 0.47 |
| Tianjin | I-TJ-0214 | nd | nd | nd | nd | nd | 0.20 | nd | 0.04 | nd | nd | 6.35 |
| I-TJ-0221 | nd | nd | nd | nd | nd | 0.08 | 0.02 | nd | nd | nd | 7.14 |
| O-TJ-0214 | nd | nd | nd | nd | nd | 0.08 | nd | nd | nd | nd | 2.67 |
| O-TJ-0221 | nd | nd | 2.02 | nd | nd | nd | nd | nd | nd | 0.02 | 12.77 |
| XinZhou, Shanxi | I-XZ-0214 | nd | nd | 4.25 | 0.53 | 0.01 | 0.85 | nd | 0.05 | nd | nd | 11.34 |
| I-XZ-0221 | nd | nd | 2.86 | nd | nd | 0.85 | nd | nd | nd | nd | 7.74 |
| O-XZ-0214 | nd | nd | 8.56 | nd | 0.01 | 0.71 | nd | nd | nd | nd | 42.52 |
| O-XZ-0221 | nd | nd | 0.33 | nd | nd | nd | nd | nd | nd | nd | 3.59 |
| Handan,  Hebei | I-HD-0214 | nd | nd | 3.48 | nd | nd | 0.29 | nd | nd | nd | nd | 15.44 |
| I-HD-0221 | nd | nd | 0.73 | nd | nd | nd | nd | nd | nd | nd | 3.42 |
| O-HD-0214 | nd | nd | nd | nd | nd | nd | nd | nd | nd | nd | 1.48 |
| O-HD-0221 | nd | nd | 0.53 | nd | nd | 0.14 | nd | 0.07 | nd | 0.10 | 4.69 |
| Sanmenxia, Henan | I-SMX-0214 | nd | nd | 1.40 | nd | nd | 0.27 | nd | nd | 0.01 | 0.04 | 32.50 |
| I-SMX-0221 | nd | nd | 0.52 | nd | nd | nd | nd | nd | 0.01 | 0.03 | 6.28 |
| O-SMX-0214 | nd | nd | nd | nd | nd | nd | nd | nd | 0.01 | 0.02 | 27.77 |
| O-SMX-0221 | nd | nd | nd | nd | nd | 0.13 | 0.03 | nd | nd | nd | 5.49 |
| Nanyang, Henan | I-NY-0214 | nd | nd | nd | nd | nd | nd | nd | nd | nd | nd | 0.76 |
| I-NY-0221 | nd | nd | nd | 0.61 | nd | nd | nd | nd | nd | nd | 0.90 |
| O-NY-0214 | nd | nd | nd | nd | nd | nd | nd | nd | nd | nd | nd |
| O-NY-0221 | nd | nd | nd | nd | nd | nd | nd | nd | nd | nd | 0.12 |
| Jiujiang, Jiangxi | I-JJ-0214 | 2.31 | 3.05 | nd | 0.75 | nd | 0.33 | 0.01 | 0.32 | 0.18 | nd | 10.37 |
| I-JJ-0221 | 0.17 | 1.83 | nd | 0.42 | nd | 0.14 | nd | 0.15 | 0.08 | nd | 3.41 |
| O-JJ-0214 | 5.41 | 2.54 | nd | 1.53 | nd | 0.18 | 0.03 | 0.09 | 0.04 | nd | 17.57 |
| O-JJ-0221 | 0.30 | 0.67 | nd | 0.20 | nd | 0.05 | nd | 0.03 | nd | nd | 1.54 |
| Hongkong | I-HK-0214 | nd | nd | nd | nd | 0.01 | nd | nd | nd | 0.09 | nd | 15.55 |
| I-HK-0221 | nd | nd | 0.34 | nd | nd | 0.59 | nd | nd | 0.06 | nd | 12.41 |
| O-HK-0214 | nd | nd | 1.57 | nd | nd | nd | nd | 0.35 | nd | nd | 28.91 |
| O-HK-0221 | nd | nd | 0.28 | nd | nd | nd | nd | nd | 0.13 | nd | 7.44 |
| Shijiazhuang, Hebei | I-SJZ-0214 | nd | nd | nd | nd | nd | nd | nd | nd | nd | nd | 1.00 |
| I-SJZ-0221 | nd | nd | 0.28 | nd | nd | nd | nd | nd | nd | nd | 0.28 |
| Sanya, Hainan | I-SY-0214 | 0.01 | nd | 3.33 | nd | nd | nd | nd | nd | nd | nd | 6.18 |
| I-SY-0221 | nd | 0.01 | 1.14 | nd | nd | nd | nd | nd | nd | nd | 6.99 |

nd: not detected

∑PFAA*: The sigma concentrations of 22 PFAA which could be detected in this study.

Table S5 The hand-to-mouth exposure (pg/kg bw) of PFAA with more than 50% detection frequencies via ingestion intake for 2 years old toddlers

| City | Sample label | | Ingestion intake | |  |  |  |  |  |  |
| --- | --- | --- | --- | --- | --- | --- | --- | --- | --- | --- |
|  |  |  | PFBA | PFNA | PFDA | PFUnDA | PFBS | 6:2 FTSA | HFPO-DA | ∑PFAA |
| Harbin, Heilongjiang | I-HRB-0214 | | 0.552 | 0.046 | 0.041 | 0.005 | 0.003 | 0.048 | 0.149 | 0.953 |
|  | I-HRB-0221 | | 0.310 | 0.049 | 0.052 | 0.012 | 0.005 | 0.055 |  | 0.618 |
| Ordos, Inner Mongolia Municipality | I-ORDS-0214 | | 0.355 | 0.031 |  |  | 0.006 |  |  | 0.392 |
| I-ORD-0221 | | 0.253 |  |  |  |  |  | 0.125 | 0.379 |
| Tianjin | I-TJ-0214 |  | 1.112 | 0.222 | 0.032 |  | 0.032 | 0.040 |  | 1.885 |
|  | I-TJ-0221 |  | 0.204 | 1.427 | 0.039 | 0.008 | 0.012 |  |  | 2.121 |
| XinZhou, Shanxi | I-XZ-0214 |  | 0.999 | 0.075 | 0.007 | 0.006 | 0.011 | 0.083 | 1.262 | 3.366 |
|  | I-XZ-0221 |  | 1.020 | 0.072 | 0.005 |  |  | 0.097 | 0.850 | 2.297 |
| Handan,  Hebei | I-HD-0214 | | 1.673 | 0.238 | 0.040 | 0.013 | 0.019 | 0.139 | 1.032 | 4.583 |
|  | I-HD-0221 | | 0.680 | 0.043 | 0.014 | 0.006 |  | 0.055 | 0.217 | 1.015 |
| Sanmenxia, Henan | I-SMX-0214 | | 7.315 | 0.549 | 0.081 | 0.004 | 0.038 | 0.425 | 0.416 | 9.649 |
|  | I-SMX-0221 | | 1.011 | 0.325 | 0.068 | 0.007 | 0.011 | 0.119 | 0.153 | 1.866 |
| Nanyang, Henan | I-NY-0214 |  |  |  | 0.006 |  |  | 0.192 |  | 0.226 |
|  | I-NY-0221 |  |  |  |  |  | 0.005 | 0.081 |  | 0.266 |
| Jiujiang, Jiangxi | I-JJ-0214 |  | 0.521 |  | 0.464 | 0.018 |  |  |  | 3.079 |
|  | I-JJ-0221 |  |  |  | 0.157 |  |  |  |  | 1.014 |
| Hongkong | I-HK-0214 |  | 3.404 | 0.438 | 0.044 | 0.033 | 0.351 | 0.315 |  | 4.616 |
|  | I-HK-0221 |  | 2.490 | 0.432 | 0.145 | 0.029 | 0.031 | 0.262 | 0.101 | 3.683 |
| Shijiazhuang, Hebei | I-SJZ-0214 | | 0.170 | 0.035 | 0.005 |  |  |  |  | 0.297 |
|  | I-SJZ-0221 | |  |  |  |  |  |  | 0.082 | 0.082 |
| Sanya, Hainan | I-SY-0214 |  | 0.740 | 0.031 | 0.013 | 0.027 |  |  | 0.988 | 1.836 |
|  | I-SY-0221 |  | 1.448 | 0.125 | 0.028 | 0.013 | 0.004 | 0.085 | 0.337 | 2.075 |

Table S6 The hand-to-mouth daily exposure (pg/kg bw) with more than 50% detection frequencies via dermal absorption for 2 years old toddlers

| City | Sample label | Dermal absorption | |  |  |  |  |  |  |
| --- | --- | --- | --- | --- | --- | --- | --- | --- | --- |
|  |  | PFBA | PFNA | PFDA | PFUnDA | PFBS | 6:2 FTSA | HFPO-DA | ∑PFAA |
| Harbin, Heilongjiang | I-HRB-0214 | 0.387 | 0.032 | 0.029 | 0.004 | 0.002 | 0.034 | 0.104 | 0.668 |
|  | I-HRB-0221 | 0.217 | 0.034 | 0.036 | 0.008 | 0.003 | 0.039 |  | 0.433 |
| Ordos, Inner Mongolia Municipality | I-ORDS-0214 | 0.249 | 0.021 |  |  | 0.004 |  |  | 0.274 |
| I-ORD-0221 | 0.178 |  |  |  |  |  | 0.088 | 0.265 |
| Tianjin | I-TJ-0214 | 0.779 | 0.156 | 0.022 |  | 0.022 | 0.028 |  | 1.321 |
|  | I-TJ-0221 | 0.143 | 1.000 | 0.028 | 0.006 | 0.008 |  |  | 1.486 |
| XinZhou, Shanxi | I-XZ-0214 | 0.700 | 0.053 | 0.005 | 0.004 | 0.007 | 0.058 | 0.884 | 2.359 |
|  | I-XZ-0221 | 0.715 | 0.050 | 0.004 |  |  | 0.068 | 0.595 | 1.610 |
| Handan,  Hebei | I-HD-0214 | 1.172 | 0.167 | 0.028 | 0.009 | 0.013 | 0.098 | 0.723 | 3.211 |
|  | I-HD-0221 | 0.476 | 0.030 | 0.010 | 0.004 |  | 0.039 | 0.152 | 0.711 |
| Sanmenxia, Henan | I-SMX-0214 | 5.125 | 0.385 | 0.057 | 0.003 | 0.027 | 0.298 | 0.291 | 6.760 |
|  | I-SMX-0221 | 0.708 | 0.228 | 0.048 | 0.005 | 0.008 | 0.083 | 0.107 | 1.307 |
| Nanyang, Henan | I-NY-0214 |  |  | 0.004 |  |  | 0.135 |  | 0.158 |
|  | I-NY-0221 |  |  |  |  | 0.004 | 0.056 |  | 0.186 |
| Jiujiang, Jiangxi | I-JJ-0214 | 0.365 |  | 0.325 | 0.013 |  |  |  | 2.157 |
|  | I-JJ-0221 |  |  | 0.110 |  |  |  |  | 0.710 |
| Hongkong | I-HK-0214 | 2.385 | 0.307 | 0.031 | 0.023 | 0.246 | 0.221 |  | 3.234 |
|  | I-HK-0221 | 1.745 | 0.302 | 0.101 | 0.021 | 0.022 | 0.183 | 0.071 | 2.581 |
| Shijiazhuang, Hebei | I-SJZ-0214 | 0.119 | 0.025 | 0.003 |  |  |  |  | 0.208 |
|  | I-SJZ-0221 |  |  |  |  |  |  | 0.057 | 0.057 |
| Sanya, Hainan | I-SY-0214 | 0.518 | 0.022 | 0.009 | 0.019 |  |  | 0.692 | 1.286 |
|  | I-SY-0221 | 1.014 | 0.088 | 0.019 | 0.009 | 0.003 | 0.060 | 0.236 | 1.454 |


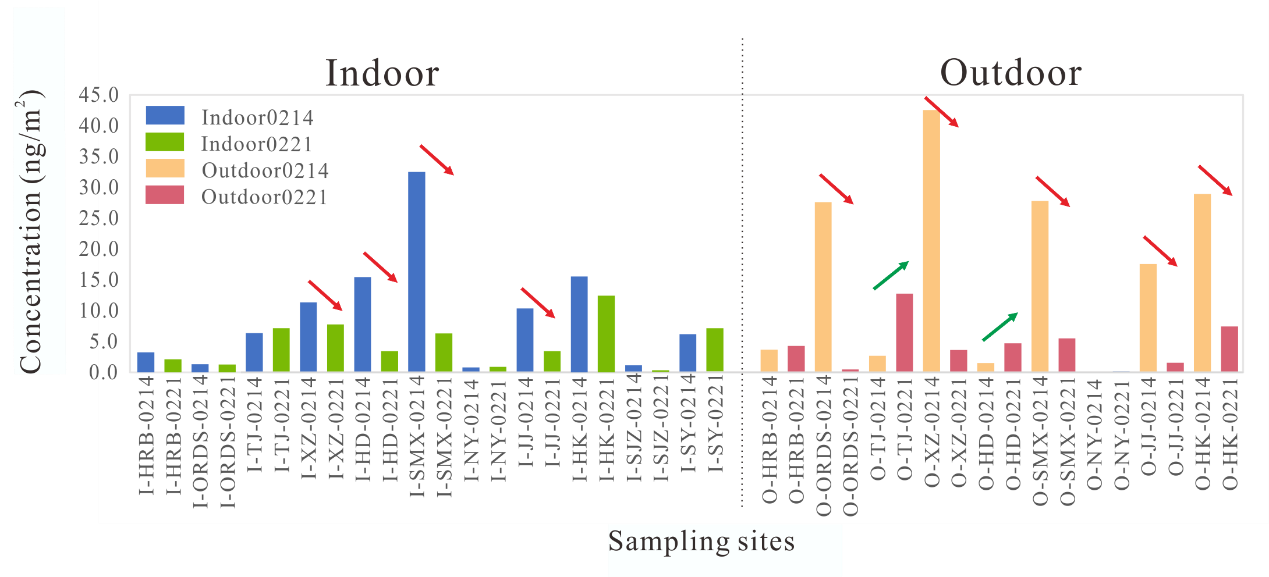


Figure S1 Comparison of the two sampling campaigns (SC I and SC II).
